# Supplementary material for: Comprehensive Investigation of Stereoselective Food Drug Interaction Potential of Resveratrol on Nine P450 and Six UGT Isoforms in Human Liver Microsomes
Source: MDPI journal article supplement (doi:10.3390/pharmaceutics13091419), 2021-09-07
Supplement: s1 [file s1]

# Supplementary Materials: Comprehensive Investigation of Stereoselective Food Drug Interaction Potential of Resveratrol on Nine P450 and Six UGT Isoforms in Human Liver Microsomes

Seung-Bae Ji<sup>†</sup>, So-Young Park<sup>†</sup>, Subin Bae<sup>†</sup>, Hyung-Ju Seo, Sin-Eun Kim, Gyung-Min Lee and Zhexue Wu,<sup>\*</sup> Kwang-Hyeon Liu

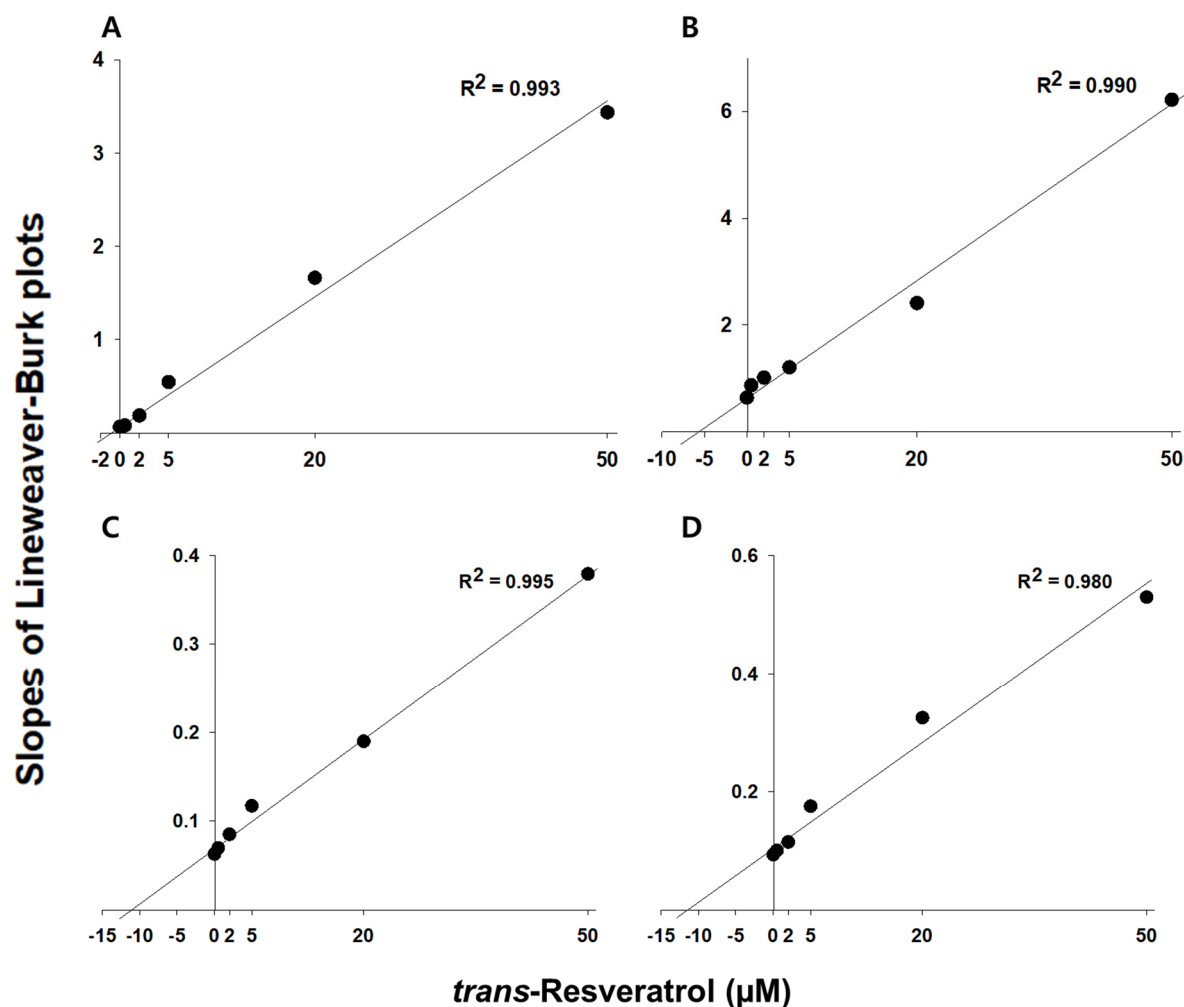

**Figure S1.** Representative secondary Lineweaver-Burk plots obtained from a kinetic study of CYP1A2-mediated phenacetin *O*-deethylation (A), CYP2C19-mediated *S*-mephenytoin hydroxylation (B), CYP2E1-mediated chlorzoxazone hydroxylation (C), and CYP3A-mediated nifedipine dehydrogenation (D) in the presence of different concentrations of *trans*-resveratrol (0, 0.5, 2.0, 5.0, 20, and 50 μM) in pooled human liver microsomes (HLMs).

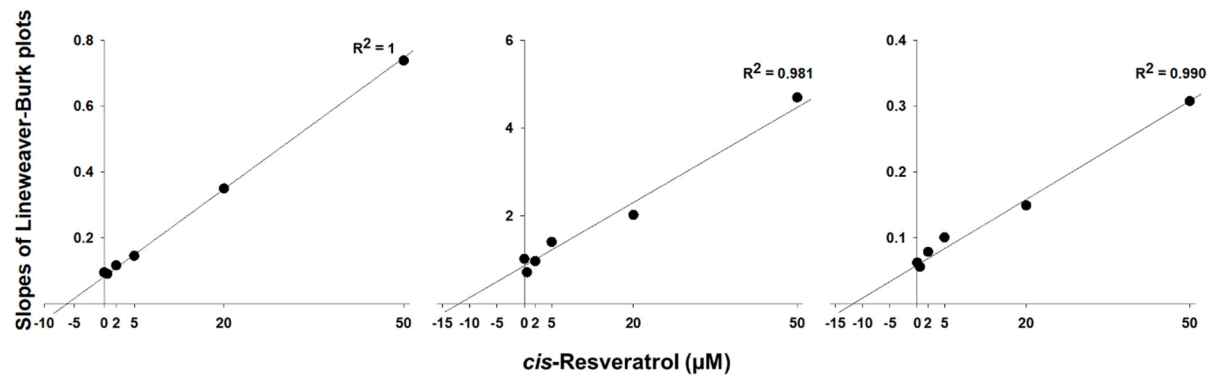

**Figure S2.** Representative secondary Lineweaver-Burk plots obtained from inhibition kinetic studies of CYP1A2-mediated phenacetin *O*-deethylation (A), CYP2C19-mediated *S*-mephenytoin hydroxylation (B), and CYP2E1-mediated chlorzoxazone hydroxylation (C) in the presence of different concentrations of *cis*-resveratrol (0, 0.5, 2.0, 5.0, 20, and 50  $\mu$ M) in pooled human liver microsomes.
